# Supplementary material for: Electronic structure calculations and quantum dynamics of rotational deexcitation of CNNC by He
Source: Royal Society of Chemistry journal article supplement (doi:10.1039/d1cp04273d), 2021-12-17
Supplement: d1cp04273d1.pdf [file d1cp04273d1.pdf]

## Electronic Structure Calculations and Quantum Dynamics of Rotational Deexcitation of CNNC by He

Ritika, Sanchit Kumar, and T. J. Dhilip Kumar  
Quantum Dynamics Lab, Department of Chemistry  
Indian Institute of Technology Ropar, Rupnagar 140001, India

Email: [dhilip@iitrpr.ac.in](mailto:dhilip@iitrpr.ac.in)

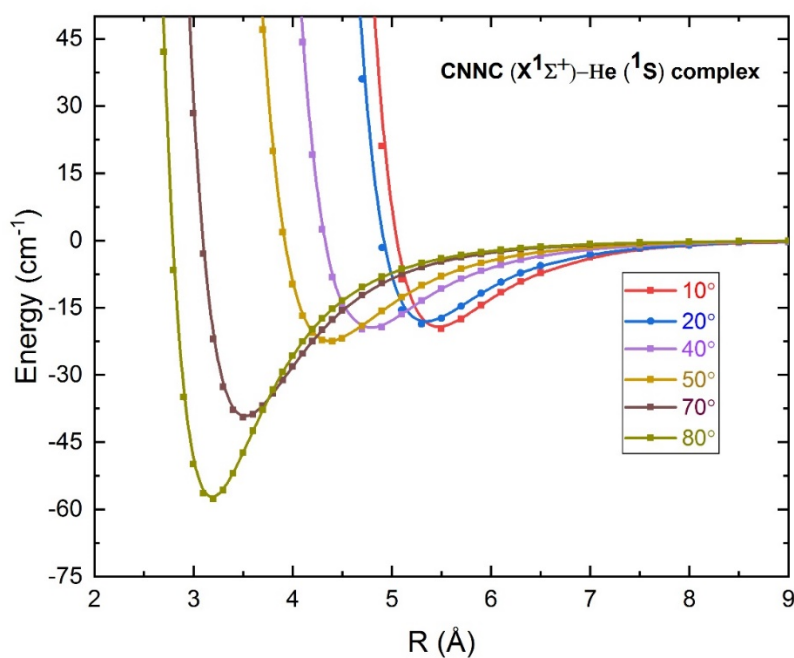

**Figure S1:** Ab initio potential energy curves for  $\theta = 10^\circ, 20^\circ, 40^\circ, 50^\circ, 70^\circ$  and  $80^\circ$ .

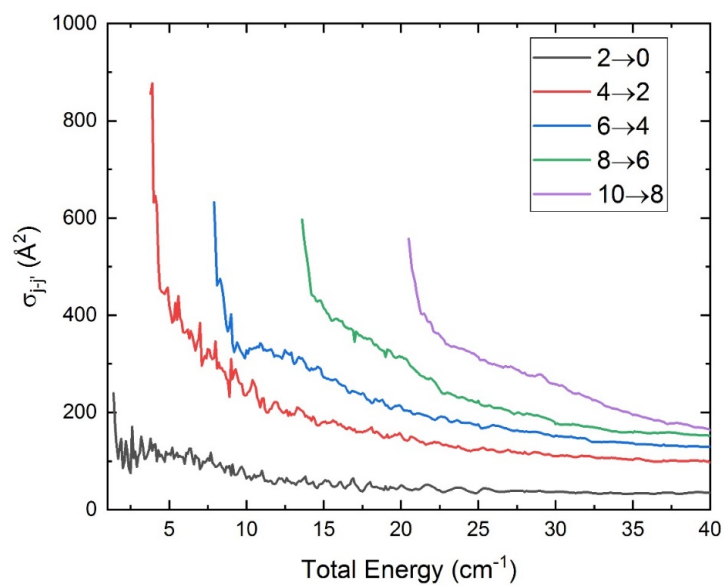

**Figure S2:** Cross sections as a function of total energy ranging from 0.5 to 40  $\text{cm}^{-1}$  for transitions  $j \rightarrow j'$ .

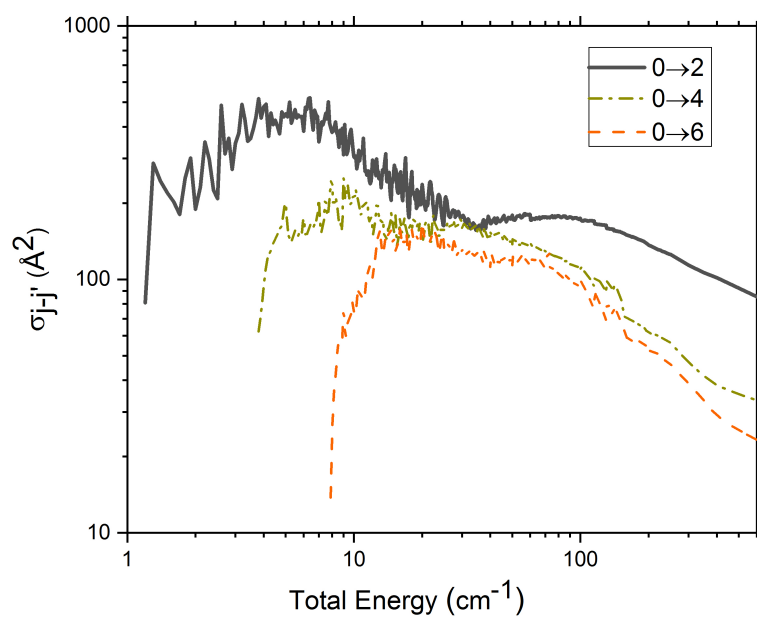

**Figure S3:** Excitation cross-sections of CNNC-He complex for transitions  $j=0 \rightarrow j'$ .

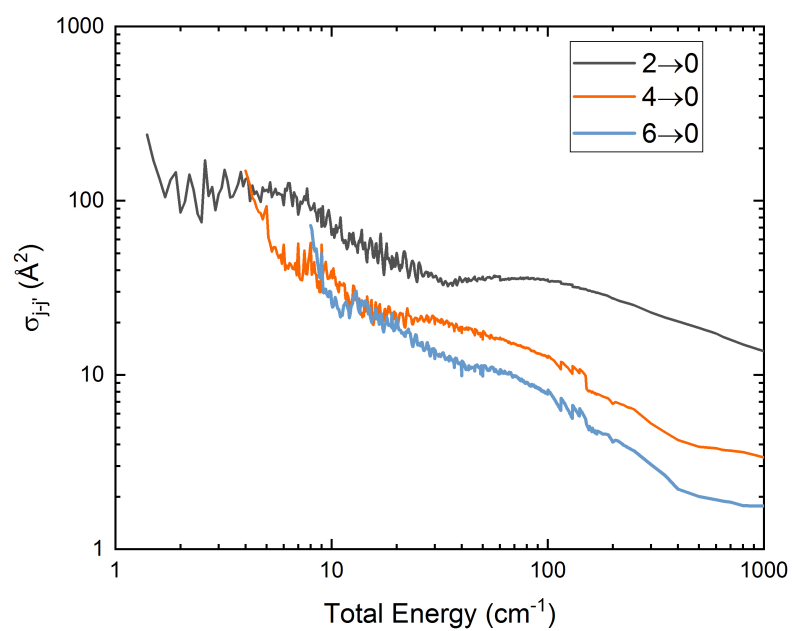

**Figure S4:** Deexcitation cross-sections of CNNC-He complex for transitions  $j \rightarrow j'=0$ .

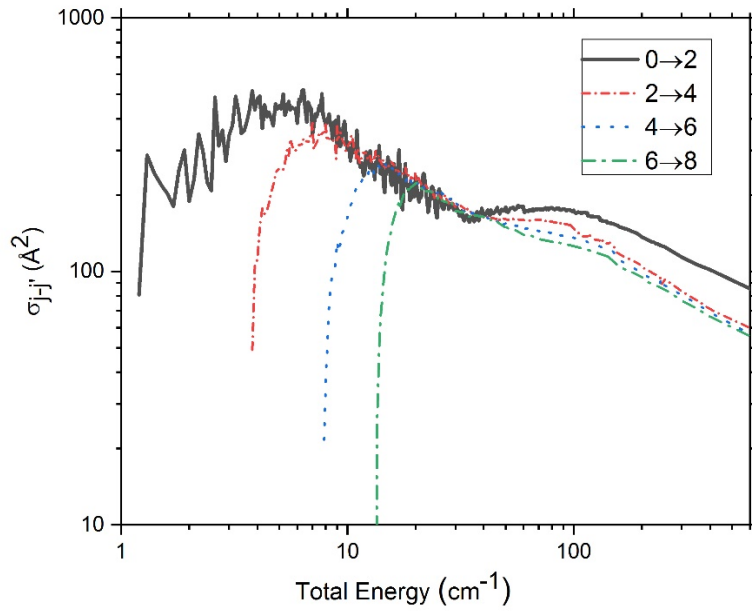

**Figure S5:** Variation of rotational excitation inelastic cross sections with total energy up to  $650 \text{ cm}^{-1}$  with  $\Delta j=2$  for even  $j$  values.

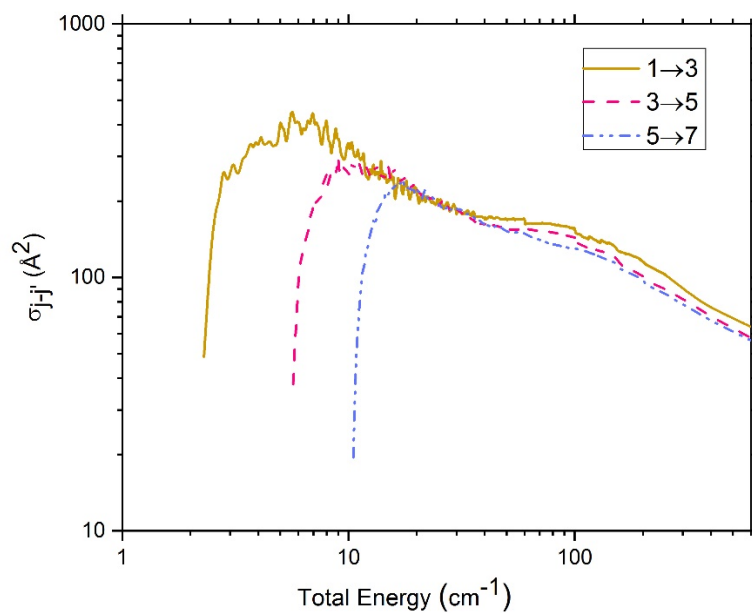

**Figure S6:** Variation of rotational excitation inelastic cross sections with total energy up to  $650 \text{ cm}^{-1}$  with  $\Delta j=2$  for odd  $j$  values.

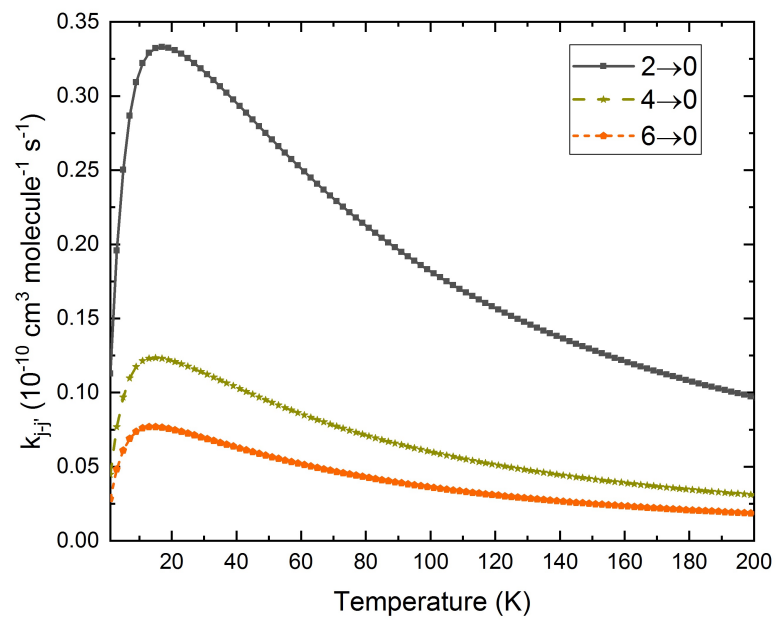

**Figure S7:** Rate coefficients of CNNC-He complex for  $j \rightarrow j'=0$  for up to 200 K.
